# Supplementary material
Source: PubMed Central journal article supplement (PMC2556827)
Supplement: pp.108.126342_1.pdf [file pp.108.126342_1.pdf]

**Supplemental Table S3 Upregulated fatty acid synthetic genes in *LEC1-OXI* plants**

| Category                                  | AGI ID    | log <sub>2</sub> ratio                               | Annotation                                            |
|-------------------------------------------|-----------|------------------------------------------------------|-------------------------------------------------------|
| Synthesis and storage of oil              | At3g01570 | 11.2                                                 | Oleosin                                               |
|                                           | At3g27660 | 11.0                                                 | Oleosin                                               |
|                                           | At4g25140 | 11.0                                                 | Oleosin                                               |
|                                           | At5g40420 | 9.8                                                  | Oleosin                                               |
|                                           | At5g51210 | 8.8                                                  | Oleosin                                               |
|                                           | At3g18570 | 6.8                                                  | Oleosin                                               |
|                                           | At5g55240 | 6.7                                                  | Caleosin                                              |
| Fatty acid synthesis in plastids          | At5g27200 | 6.2                                                  | Plastidial Acyl Carrier Protein                       |
|                                           | At3g02630 | 3.6                                                  | Stearoyl-ACP Desaturase                               |
|                                           | At5g16240 | 3.4                                                  | Stearoyl-ACP Desaturase                               |
|                                           | At3g05020 | 3.4                                                  | Plastidial Acyl Carrier Protein                       |
|                                           | At5g15530 | 3.2                                                  | ACCase, biotin carboxyl carrier protein               |
|                                           | At3g16950 | 3.1                                                  | Plastidial Dihydrolipoamide Dehydrogenase             |
|                                           | At5g08415 | 2.3                                                  | Lipoic acid synthase family protein                   |
|                                           | At3g25110 | 2.1                                                  | Acyl-ACP Thioesterase FatA                            |
|                                           | At5g35360 | 2.0                                                  | ACCase, biotin carboxylase                            |
|                                           | At2g38040 | 1.9                                                  | ACCase, $\alpha$ -carboxyltransferase                 |
|                                           | At1g62610 | 1.9                                                  | Plastidial Ketoacyl-ACP Reductase                     |
|                                           | At2g30200 | 1.8                                                  | Malonyl-CoA:ACP Malonyltransferase                    |
|                                           | At2g05990 | 1.6                                                  | Plastidial Enoyl-ACP Reductase                        |
|                                           | At1g74960 | 1.6                                                  | Ketoacyl-ACP synthase II                              |
|                                           | At1g01090 | 1.4                                                  | Plastidial pyruvate dehydrogenase E1 $\alpha$ subunit |
| At2g43710                                 | 1.3       | Stearoyl-ACP Desaturase                              |                                                       |
| At2g34590                                 | 1.2       | Plastidial pyruvate dehydrogenase E1 $\beta$ subunit |                                                       |
| Phospholipid Synthesis in ER              | At2g46210 | 2.8                                                  | Ceramide Sphingobase $\Delta$ -8 Desaturase           |
|                                           | At2g29980 | 1.9                                                  | ER linoleate Desaturase                               |
|                                           | At2g41540 | 1.5                                                  | ER dihydroxyacetone-phosphate reductase               |
|                                           | At3g12120 | 1.5                                                  | ER oleate desaturase                                  |
|                                           | At1g80950 | 1.1                                                  | Acyltransferase                                       |
| At4g38570                                 | 1.0       | Phosphatidylinositol synthase                        |                                                       |
| Metabolism of acyl-lipids in mitochondria | At1g03090 | 1.2                                                  | Methylcrotonyl-CoA carboxylase, biotinylated subunit  |
|                                           | At3g06850 | 1.1                                                  | Dihydrolipoamide transacylase                         |
| Fatty acid elongation                     | At4g34520 | 9.6                                                  | Ketoacyl-CoA synthase                                 |
| Miscellaneous                             | At3g23470 | 3.4                                                  | Cyclopropane fatty acid synthase                      |
|                                           | At5g64080 | 3.0                                                  | Lipid transfer protein type 5                         |

|                                        |           |     |                                                    |
|----------------------------------------|-----------|-----|----------------------------------------------------|
|                                        | At1g09430 | 1.4 | ATP citrate lyase A subunit                        |
|                                        | At1g65880 | 6.6 | Acyl-activating enzyme 11 (AAE11)                  |
|                                        | At2g27360 | 2.5 | Acyl-CoA binding protein                           |
| <b>Other lipid<br/>synthetic genes</b> | At1g52670 | 2.2 | Biotin/lipoyl attachment domain-containing protein |
|                                        | At5g27630 | 1.8 | Acyl-CoA binding protein                           |
|                                        | At3g16170 | 1.8 | Acyl-activating enzyme 13                          |
|                                        | At5g02100 | 1.6 | Oxysterol-binding family protein                   |
|                                        | At2g43360 | 1.6 | Biotin synthase (BIO2)                             |
