# Supplementary material
Source: PubMed Central journal article supplement (PMC2556827)
Supplement: pp.108.126342_2.pdf [file pp.108.126342_2.pdf]

## Supplemental Table S4 Primers Used in this study

| Gene                             | AGI ID    | Sequences (5'to 3')                                                  | Experiments        |
|----------------------------------|-----------|----------------------------------------------------------------------|--------------------|
| <i>FAD2</i>                      | At3g12120 | ATGGGTGCAGGTGGAAGAAT<br>CCAGGAGAAGTAAGGGACGA                         | qRT-PCR            |
| <i>FAD3</i>                      | At2g29980 | CATAAGCGGCGTGCATTTTG<br>ACGAAAGCAGCTAAACATGT<br>CGCTGTGCATAAGCATTCTC | qRT-PCR and RT-PCR |
| <i>FAB2</i>                      | At2g43710 | TTGGGGCCGGAGCTGAGAGC                                                 | qRT-PCR            |
| <i>FAE1</i>                      | At4g34520 | CGTTAAGCTCCTTACC GTT<br>TCTGTCTCTCACGTGACGC                          | qRT-PCR and RT-PCR |
| <i>CAC2</i>                      | At5g35360 | TTCCGAATGTTCTGTCTGCGGCTA<br>TCGCTTTGTCTCCATAACACGGA                  | qRT-PCR and RT-PCR |
| <i>ACP1</i>                      | At3g05020 | AATCTATCCTTCAACCTCCGCCGT<br>AGAGAATCTGCTCCAAGGTCAGCA                 | qRT-PCR            |
| <i>PDH-E1<math>\alpha</math></i> | At1g01090 | GCATTTGGGATGCCTGGTGTTCAT<br>GCGTATTTGGCTTCTCAGCAGCA                  | qRT-PCR and RT-PCR |
| <i>EAR</i>                       | At2g05990 | TCAAGGAAAGGCTATCTCGCTGCT<br>TCACTCTCTAGTGCAGCTTTGGCA                 | qRT-PCR and RT-PCR |
| <i>MCAT</i>                      | At2g30200 | ATTCAAAGCACGAATGACGGTGCG<br>TCACCTGGCGTGCAAGTATCTTCT                 | qRT-PCR and RT-PCR |
| <i>BCCP2</i>                     | At5g15530 | AACCCAATGGGATCTCCTTTCCT<br>ATAAATTCAGAGAGCTCGGCGGGT                  | qRT-PCR and RT-PCR |
| <i>PDH-E1<math>\beta</math></i>  | At2g34590 | AAACTCGTTGCTCCTTCTCGCTCT<br>ATGAAGTAGAGCTCGCAGCAGTGT                 | qRT-PCR            |
| <i>LPD1</i>                      | At3g16950 | ATCATCATCGGAGCTGGAGTTGGT<br>TGAAGTTCCCGCATTGACCACTA                  | qRT-PCR            |
| <i>Oleosin</i>                   | At3g01570 | TCCTTTATCCTCAGAGTGGCCCTT<br>AAGGCTGCTGGTACAATAACCGGA                 | qRT-PCR and RT-PCR |
| <i>Caleosin</i>                  | At5g55240 | AGCACTACAAGCACCTGACATGGA<br>AGCCAAGATAAGCGACGCGAGTAA                 | RT-PCR             |
| UBQ5                             | At3g62250 | CTTCAGCAGCCGTTGCCTCA<br>CTGGTAAACGTAGGTGAGTCC                        | RT-PCR             |
| <i>LEC1</i>                      | At1g21970 | TTGCCAACGTGAGCAACGTAAGAC<br>TGAGATGGGCCGTGAAACCAATA                  | RT-PCR             |
| <i>LEC1</i>                      | At1g21970 | GGCTCGAGGACGGCAGAGAAACAATGGAAC<br>GGGCTAGCCAGTTTGGGTAAATCATTGTC      | pER8-LEC1          |
| <i>ABI3</i>                      | At3g24650 | TCCATTAGACAGCAGTCAAGGTTT<br>TTTACTTTCCTCAAATCCTCAGCC                 | RT-PCR             |
| <i>FUS3</i>                      | At3g26790 | ATGATGGTTGATGAAAATGTG<br>CTAGTAGAAGTCATCGAGAGA                       | RT-PCR             |
| <i>LEC2</i>                      | At1g28300 | ACAATCGCTCGCACTTCACAACAG                                             | RT-PCR             |

|                 |           |                                                                                  |                      |
|-----------------|-----------|----------------------------------------------------------------------------------|----------------------|
| <i>PIS2</i>     | At4g38570 | ACCACCTCTCTCTTGCCACAAACA<br>AACTGCATTGCCTTCTCTGTGTGC<br>ACAGGCTGTGCTGACTCTATCTGT | qRT-PCR              |
| <i>GPDHCl</i>   | At2g41540 | GGTGTTCCTGCAGTGGGAGCATTT<br>ATGCTTGCAGAATGGCCTGAGTTG                             | qRT-PCR              |
| <i>FatA</i>     | At3g25110 | AGCTGATCTCGACATGAACCAGCA<br>ATTCAGAGGTGGTGGTGGTGAGT                              | qRT-PCR              |
| <i>KASII</i>    | At1g74690 | TTAGAGGTTACTTGCTCGGCGT<br>TCGAGCAAATGCTTGCAACCTGAC                               | qRT-PCR              |
| <i>CAC3</i>     | At2g38040 | TGGAGAACAAGTATAGACAGGCA<br>GGTCTCCATGAAGCTCCATAAA                                | qRT-PCR              |
| <i>CDP-DAGS</i> | At4g22340 | TAATGGGTCGTTTCTGTGGCTGA<br>AGCATGCCACTGGACTGGTAGAAT                              | qRT-PCR              |
| <i>SDR</i>      | At1g62610 | GCGTATGCTTGTTCAAAAGGTGGT<br>TTCCGTTACCTTCTCGAGCCACT                              | qRT-PCR              |
| <i>Actin7</i>   | At5g09810 | GGAAGTGAATGGTGAAGGCTG<br>CGATTGGATACTCAGAGTGAGGA                                 | qRT-PCR              |
| <i>AtLIL</i>    | At5g47670 | ATGGAACGTGGAGGCTTCCATGGC<br>GTACTTATGTTGTTGAGTCGGAAA                             | RT-PCR               |
| <i>AccD</i>     | Atcg00500 | ACGCTGTTCAAACAGGTACAGGTC<br>ACTTCCTTCTTGCAATTCGTGCTCC                            | Probe of Northern    |
| <i>BnLIL</i>    |           | GGCTCGAGAGGGTTTGGTGATTGGGATCTTGT<br>TTACTAGTGGTATGCGTTGAAGCTCCTCTGGA             | pER10- <i>BnLIL</i>  |
| <i>BnLEC1</i>   |           | GGCTCGAGCGACAGAGAAAACAATGGAACGTGG<br>TTACTAGTTCACCTTATACTGACCATACTGGTC           | pER10- <i>BnLEC1</i> |
