# Supplementary material
Source: PubMed Central journal article supplement (PMC2556827)
Supplement: pp.108.126342_5.pdf [file pp.108.126342_5.pdf]

Figure S3 Sequence alignment of AtLEC1, BnLEC1, AtL1L and BnL1L proteins

Section 1

|           |     |   |    |    |    |    |    |   |   |   |     |   |   |   |   |   |   |   |   |   |   |   |   |   |   |   |   |   |
|-----------|-----|---|----|----|----|----|----|---|---|---|-----|---|---|---|---|---|---|---|---|---|---|---|---|---|---|---|---|---|
|           | (1) | 1 | 10 | 20 | 30 | 40 | 55 |   |   |   |     |   |   |   |   |   |   |   |   |   |   |   |   |   |   |   |   |   |
| AtLEC1    | (1) | M | P  | Q  | S  | L  | Q  | N | T | M | S   | V | A | A | D | N | I | V | Q | P | C |   |   |   |   |   |   |   |
| BnLEC1    | (1) | M | P  | Q  | S  | L  | Q  | S | I | M | --  | S | A | D | K | K | I | P | Q | P | S |   |   |   |   |   |   |   |
| AtL1L     | (1) | M | G  | H  | Y  | K  | S  | N | T | P | P   | G | A | N | L | A | G | M | P | E | N | P | K | S | G | E | E | C |
| BnL1L     | (1) | M | G  | H  | Y  | K  | S  | N | T | N | --- | P | K | L | A | S | M | L | E | N | P | K | A | G | Q | E | C |   |
| Consensus | (1) | M | P  | S  | Y  | L  | K  | N | T | N | D   | H | N | I | M | T | S | I | E | Q | N | T | N | Q | Q | P | C |   |

Section 2

|           |      |    |    |    |    |     |     |   |   |   |   |   |   |   |   |   |   |   |   |   |   |   |   |   |   |   |   |   |   |
|-----------|------|----|----|----|----|-----|-----|---|---|---|---|---|---|---|---|---|---|---|---|---|---|---|---|---|---|---|---|---|---|
|           | (56) | 56 | 70 | 80 | 90 | 100 | 110 |   |   |   |   |   |   |   |   |   |   |   |   |   |   |   |   |   |   |   |   |   |   |
| AtLEC1    | (56) | V  | Q  | Q  | M  | I   | N   | I | I | R | T | P | H | K | S | D | K | T | Q | C | S | Y | S | V | G | A | E | C |   |
| BnLEC1    | (53) | M  | Q  | Q  | M  | I   | N   | I | I | R | I | P | H | K | S | D | K | T | Q | C | S | Y | S | V | G | A | E | C |   |
| AtL1L     | (55) | T  | R  | Q  | R  | M   | I   | N | I | I | R | I | P | H | K | S | D | K | T | Q | C | S | Y | S | I | G | A | E | C |
| BnL1L     | (50) | T  | R  | Q  | R  | M   | I   | N | I | I | R | I | P | H | K | S | D | K | T | Q | C | S | Y | S | V | G | A | E | C |
| Consensus | (56) | T  | R  | Q  | R  | M   | I   | N | I | I | R | I | P | H | K | S | D | K | T | Q | C | S | Y | S | V | G | A | E | C |

Section 3

|           |       |     |     |     |     |     |     |   |   |   |   |   |   |   |   |   |   |   |   |   |   |   |   |   |   |   |     |     |
|-----------|-------|-----|-----|-----|-----|-----|-----|---|---|---|---|---|---|---|---|---|---|---|---|---|---|---|---|---|---|---|-----|-----|
|           | (111) | 111 | 120 | 130 | 140 | 150 | 165 |   |   |   |   |   |   |   |   |   |   |   |   |   |   |   |   |   |   |   |     |     |
| AtLEC1    | (111) | Q   | Q   | K   | I   | A   | D   | L | A | S | L | F | N | V | P | T | F | N | Y | E | E | D | G | A | R | E | P   | L   |
| BnLEC1    | (108) | Q   | Q   | K   | I   | A   | D   | L | A | S | L | F | D | V | P | N | F | N | Y | E | E | D | G | S | R | E | -   | F   |
| AtL1L     | (110) | Q   | Q   | K   | I   | A   | D   | L | A | S | L | F | D | I | P | T | Y | H | Y | E | E | E | G | S | S | G | --- | --- |
| BnL1L     | (105) | Q   | Q   | K   | I   | A   | D   | L | A | S | L | F | D | I | P | T | Y | H | Y | E | E | D | G | N | G | G | --- | --- |
| Consensus | (111) | Q   | Q   | K   | I   | A   | D   | L | A | S | L | F | D | I | P | T | F | N | Y | E | E | D | G | S | R | G | S   |     |

Section 4

|           |       |     |     |     |     |     |     |   |     |   |   |   |   |     |     |   |   |   |   |   |   |   |   |   |   |   |   |   |
|-----------|-------|-----|-----|-----|-----|-----|-----|---|-----|---|---|---|---|-----|-----|---|---|---|---|---|---|---|---|---|---|---|---|---|
|           | (166) | 166 | 180 | 190 | 200 | 210 | 220 |   |     |   |   |   |   |     |     |   |   |   |   |   |   |   |   |   |   |   |   |   |
| AtLEC1    | (166) | Q   | G   | N   | I   | F   | G   | S | G   | P | P | P | G | G   | L   | Q | M | M | G | Y | Q | G | S | G | D | S | V |   |
| BnLEC1    | (162) | P   | Y   | G   | G   | G   | H   | P | --- | P | P | S | G | G   | L   | Q | M | M | G | Y | H | G | S | P | G | V | G |   |
| AtL1L     | (161) | V   | M   | N   | G   | V   | K   | P | G   | M | E | G | Y | P   | V   | G | H | A | Y | R | Q | G | V | S | N | P | S |   |
| BnL1L     | (156) | V   | M   | N   | G   | V   | K   | P | G   | M | E | G | Y | --- | --- | T | A | Y | H | Q | G | A | S | N | P | S |   |   |
| Consensus | (166) | V   | Y   | N   | G   | V   | K   | P | G   | M | P | G | Y | Y   | M   | D | S | V | A | Y | Y | N | G | S | G | D | N | K |

Section 5

|           |       |     |     |     |   |   |     |     |     |     |     |     |     |
|-----------|-------|-----|-----|-----|---|---|-----|-----|-----|-----|-----|-----|-----|
|           | (221) | 221 | 230 | 243 |   |   |     |     |     |     |     |     |     |
| AtLEC1    | (218) | G   | S   | S   | S | N | M   | A   | F   | H   | G   | Y   | -   |
| BnLEC1    | (210) | G   | S   | S   | S | N | M   | V   | Y   | Q   | G   | Y   | -   |
| AtL1L     | (212) | M   | G   | S   | S | A | G   | R   | E   | F   | T   | Q   | K   |
| BnL1L     | (202) | M   | G   | S   | S | F | --- | --- | --- | --- | --- | --- | --- |
| Consensus | (221) | M   | G   | S   | S | N | M   | V   | D   | G   | Y   |     |     |
