# Supplementary material
Source: PubMed Central journal article supplement (PMC2556827)

## Experiment 1

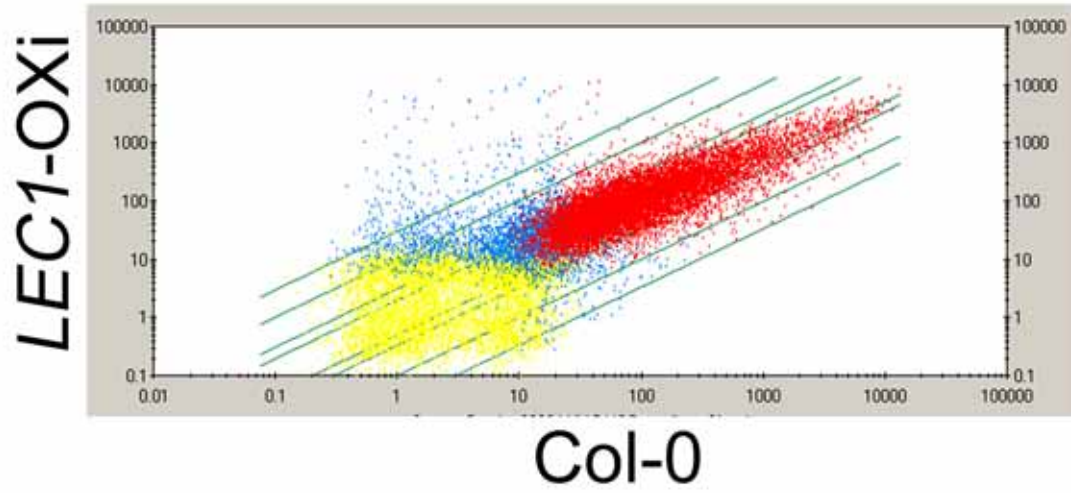

## Experiment 2

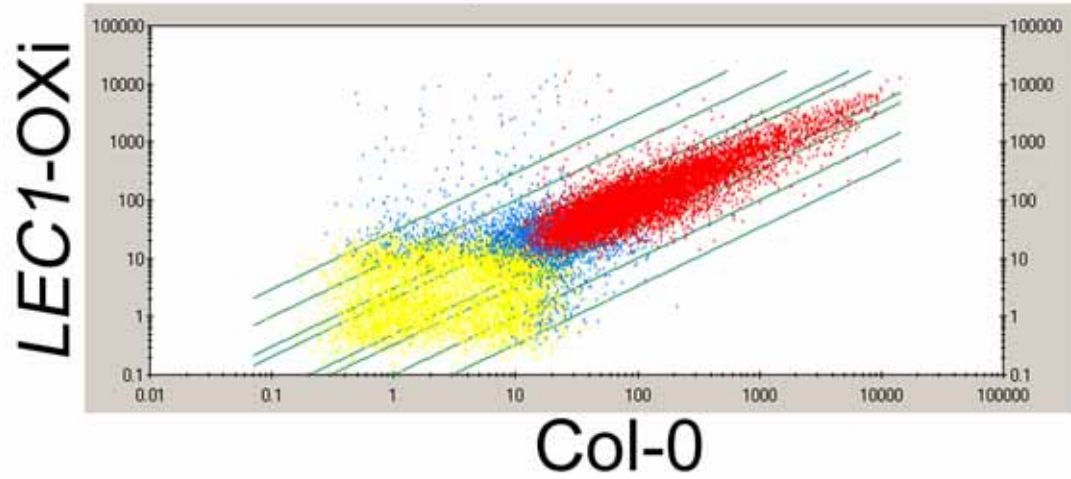

Supplement: pp.108.126342_3.pdf [file pp.108.126342_3.pdf]

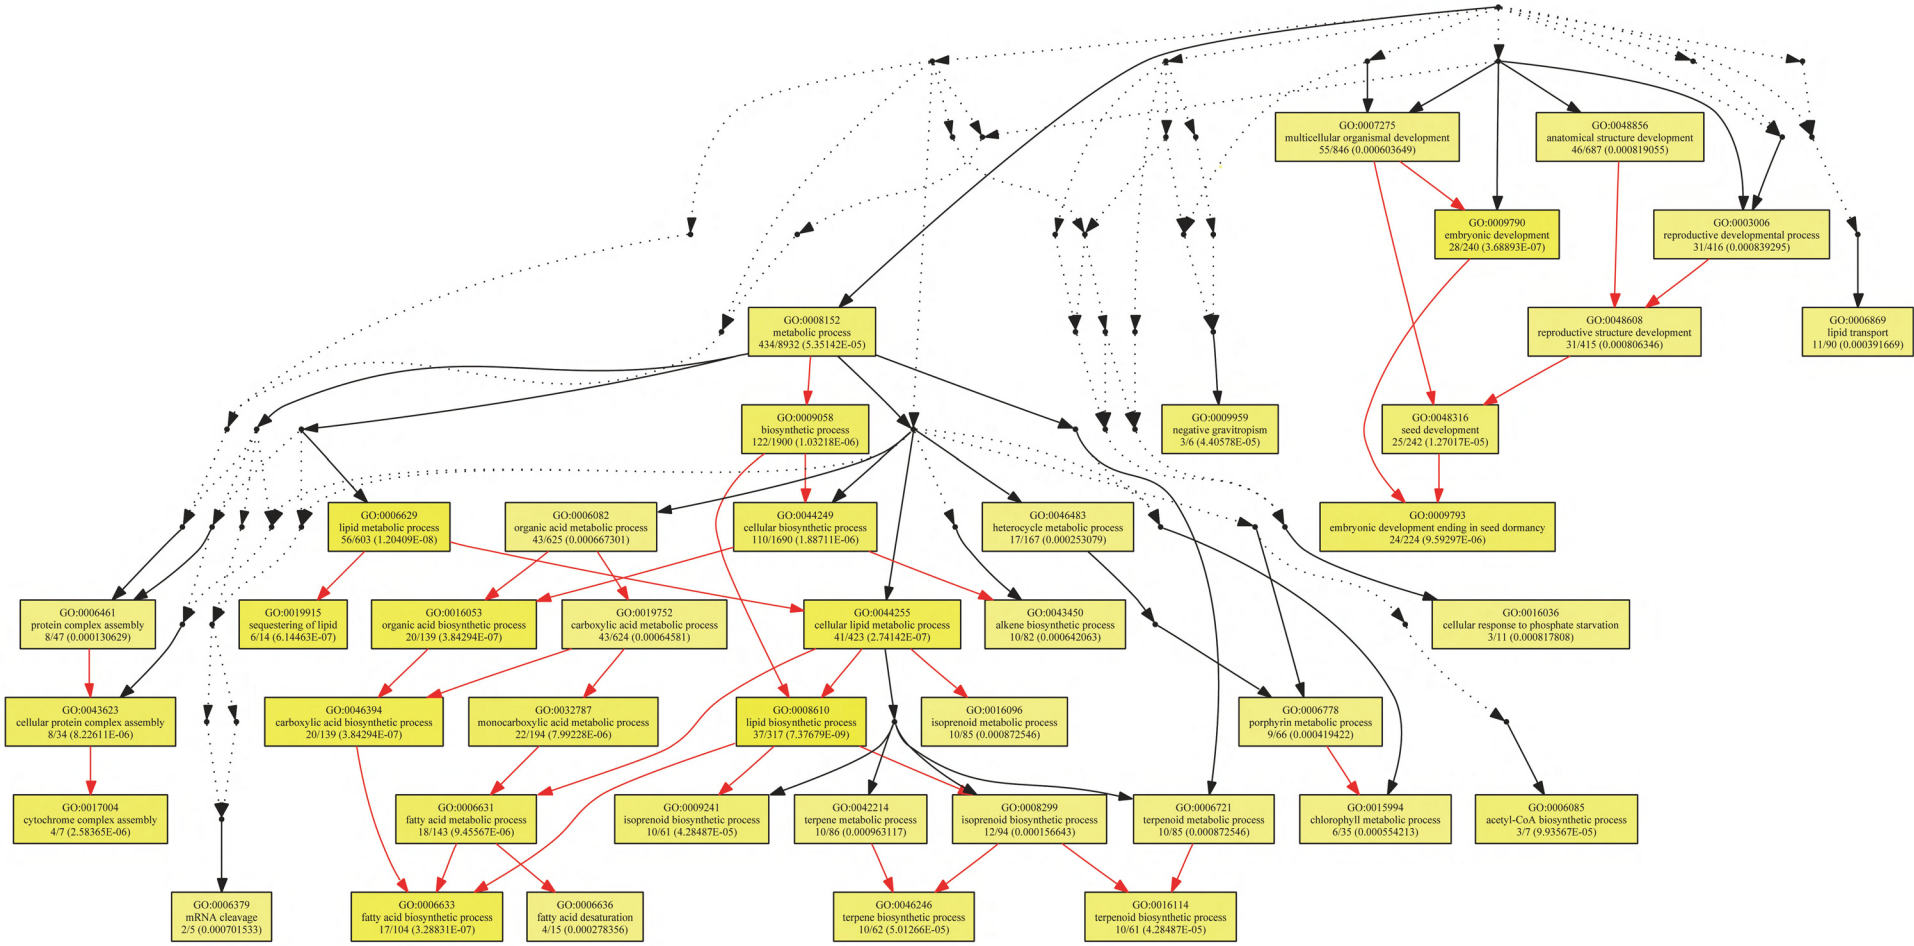

Supplement: pp.108.126342_4.pdf [file pp.108.126342_4.pdf]
